# Supplementary material for: Structural and functional investigation of zebrafish ( Danio rerio ) NOD1 leucine rich repeat domain and its interaction with iE-DAP
Source: Royal Society of Chemistry journal article supplement (doi:10.1039/c4mb00212a), 2014-07-29
Supplement: c4mb00212a1.pdf [file c4mb00212a1.pdf]

Electronic supplementary information

**Structural and functional investigation of zebrafish (*Danio rerio*) NOD1  
leucine rich repeat domain and its interaction with iE-DAP**

**Jitendra Maharana<sup>\*a</sup>, Bikash Ranjan Sahoo<sup>b</sup>, Aritra Bej<sup>b</sup>, Mahesh Chandra Patra<sup>bc</sup>,  
Budheswar Dehury<sup>d</sup>, Gopal Krushna Bhoi<sup>b</sup>, Santosh Kumar Lenka<sup>b</sup>,  
Jyoti Ranjan Sahoo<sup>b</sup>, Ajaya Kumar Rout<sup>b</sup> and Bijay Kumar Behera<sup>a</sup>**

<sup>a</sup>Biotechnology Laboratory, Central Inland Fisheries Research Institute, Barrackpore,  
Kolkata-700120, West Bengal, India

<sup>b</sup>BIF-Centre, Department of Bioinformatics, Orissa University of Agriculture and Technology,  
Bhubaneswar-751003, Odisha, India

<sup>c</sup>Animal Genomics Laboratory, Animal Biotechnology Centre, National Dairy Research Institute,  
Karnal-132001, Haryana, India

<sup>d</sup>Department of Life Science and Bioinformatics, Assam University, Silchar-788011, Assam, India

**\*Corresponding author**

Jitendra Maharana

Central Inland Fisheries Research Institute,  
Barrackpore, Kolkata-700120, West Bengal, India

Email: [jitued@gmail.com](mailto:jitued@gmail.com)

Tel: +91 3325921190/91

## Supplementary figures

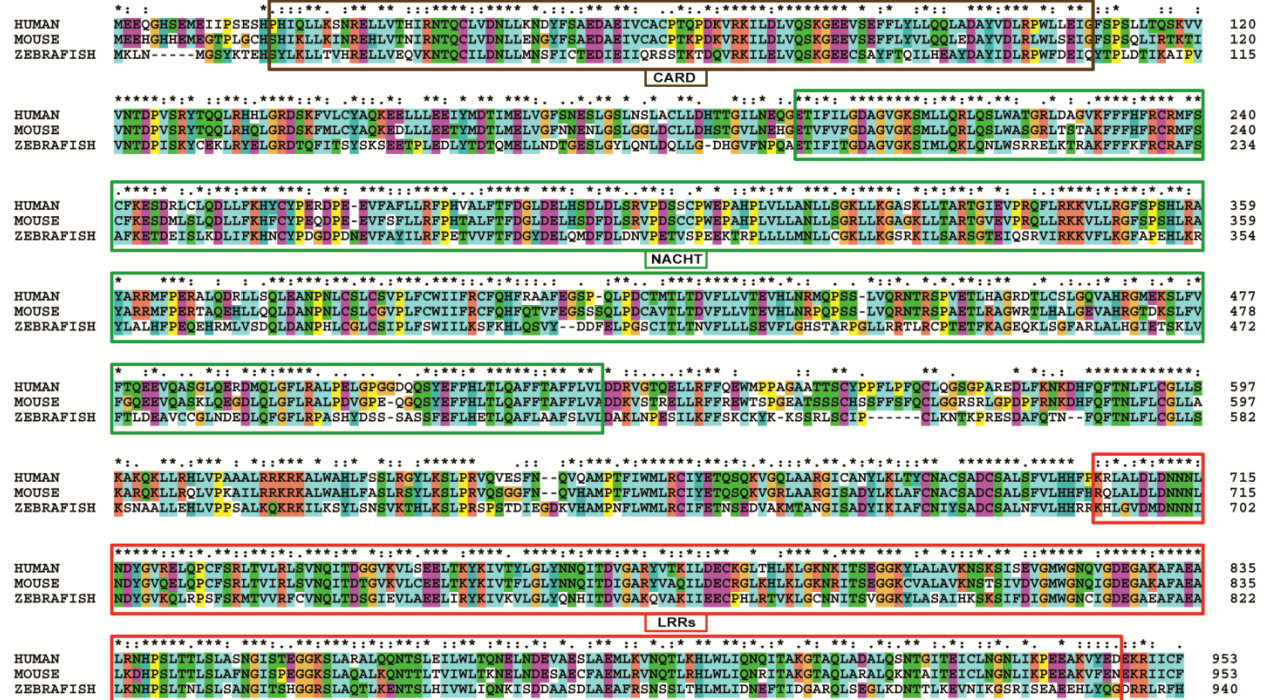

Fig. S1

Multiple sequence alignment between human, mouse and zebrafish NOD1 sequences shows the domain boundaries. The domain architecture (tripartite domain architecture *viz.*, CARD, NACHT and LRRs) is shown in different colored boxes; brown (CARD), green (NACHT) and red (LRR). The symbols ‘\*’, ‘:’, and ‘.’, represents identical, conserved and semi-conserved substitutions, respectively



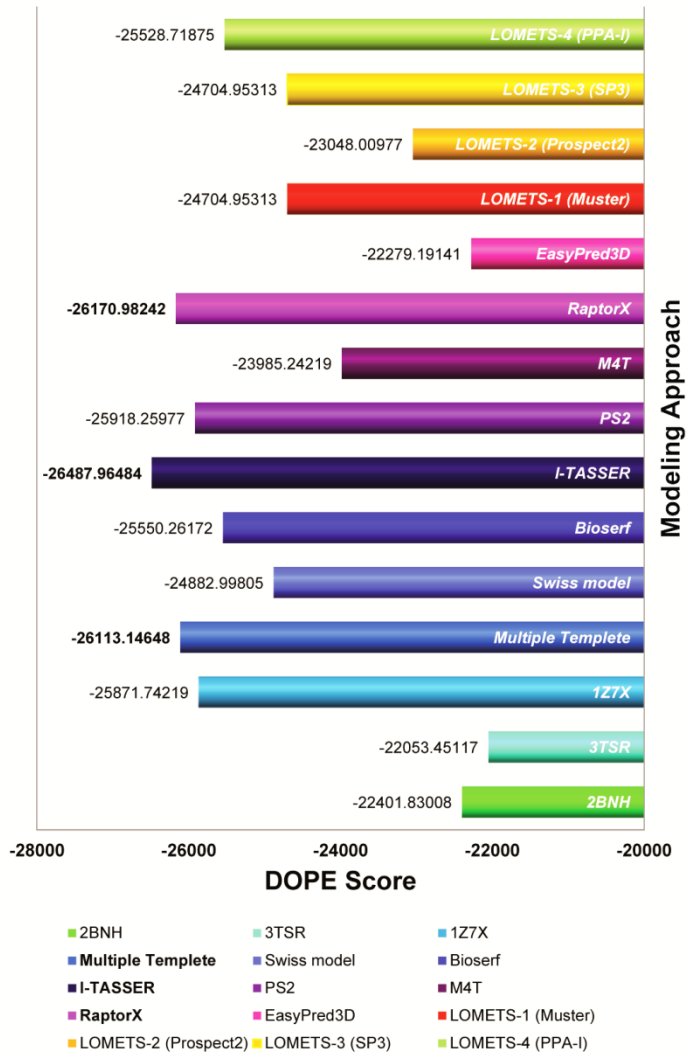

**Fig. S3**

Discrete optimized protein energy (DOPE) score profile of the zNOD1-LRR models. The DOPE score profiles of multiple-template approach, I-TASSER and Raptor-X reported are less than -26000.00 (marked in bold font) and are chosen for structural analysis

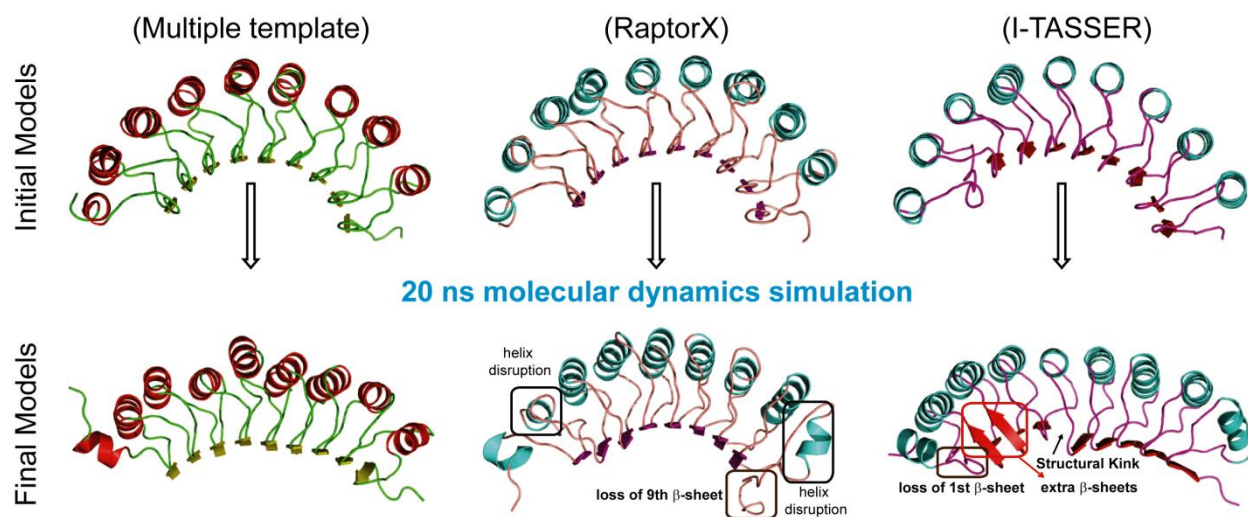

**Fig. S4**

The structural features of three different models (model-1; Multiple template), (model-2; Raptor-X) and (model-3; I-TASSER) of zNOD1-LRR before and after molecular dynamics simulation. The structurally disorder regions are labeled

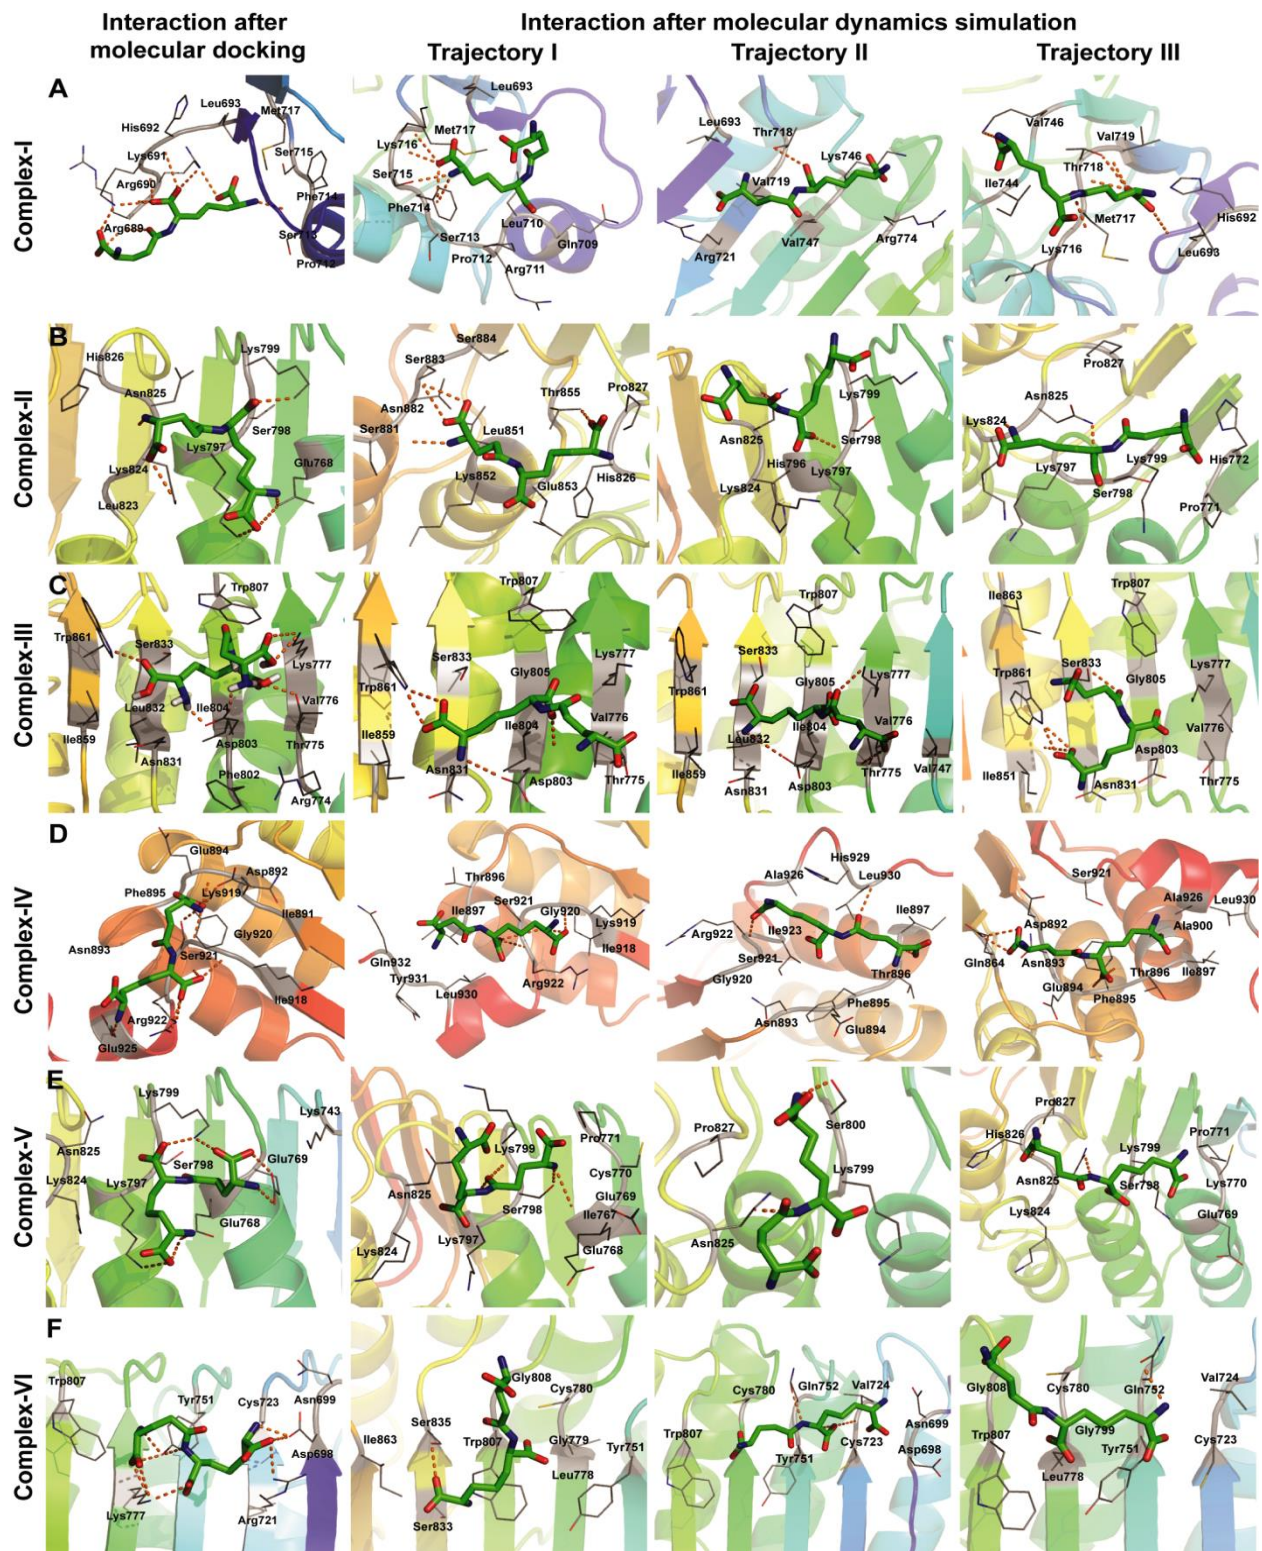

**Fig. S5**

Molecular interaction of six different complexes of zNOD1-LRR and iE-DAP before and after MD simulation. Polar contacts are displayed in dotted red lines

## Supplementary tables

**Table S1.**

Atomic compositions and properties of different simulation boxes

| Simulation system                                                              | Number of water molecule | Number of Na <sup>+</sup> | Number of Cl <sup>-</sup> | Total number of atoms |
|--------------------------------------------------------------------------------|--------------------------|---------------------------|---------------------------|-----------------------|
| <b>zNOD1-LRR (apo system; 245 amino acids)</b>                                 |                          |                           |                           |                       |
| Model-1 (multiple template)                                                    | 13242                    | 42                        | 40                        | 42230                 |
| Model-2 (Raptor-X)                                                             | 13384                    | 42                        | 40                        | 42656                 |
| Model-3 (I-TASSER)                                                             | 13353                    | 42                        | 40                        | 42563                 |
| <b>zNOD1-LRR + iE-DAP (holo system; 245 amino acids and 1 iE-DAP molecule)</b> |                          |                           |                           |                       |
| Complex I                                                                      | 14030                    | 44                        | 42                        | 44627                 |
| Complex II                                                                     | 14030                    | 44                        | 42                        | 44627                 |
| Complex III                                                                    | 14036                    | 44                        | 42                        | 44645                 |
| Complex IV                                                                     | 14044                    | 44                        | 42                        | 44669                 |
| Complex V                                                                      | 14028                    | 44                        | 42                        | 44621                 |
| Complex VI                                                                     | 14028                    | 44                        | 42                        | 44621                 |

**Table S2.**

Protein threading results of zNOD1-LRR domain obtained from different web servers

| Program              | Template PDB ID and chain number | % of identity | Score    |
|----------------------|----------------------------------|---------------|----------|
| PSI-BLAST            | 3tsr E                           | 26%           | 2e-12    |
|                      | 1dfj I                           | 24%           | 6e-12    |
|                      | 1z7x Y                           | 23%           | 3e-08    |
| DELTA-BLAST          | 3tsr E                           | 21%           | 6e-49    |
|                      | 2bnh A                           | 23%           | 3e-46    |
|                      | 1z7x W                           | 22%           | 6e-46    |
| BLASTp               | 3tsr E                           | 27%           | 6.2e-12  |
|                      | 2bnh A                           | 24%           | 2.06e-11 |
|                      | 2q4g W                           | 27%           | 3.61e-08 |
| SPARKS-X             | 1z7x W                           | 18.5%         | 20.84    |
|                      | 1yrg A                           | 13.9%         | 15.75    |
|                      | 2ca6 A                           | 13.9%         | 15.74    |
| ModLink <sup>+</sup> | 2bnh A                           | 22%           | 8e-52    |
|                      | 1z7x W                           | 21%           | 6e-49    |
|                      | 2ca6 A                           | 20%           | 2e-29    |
| PDB Blast            | 2bnh A                           | 24%           | 1.37e-35 |
|                      | 2q4g W                           | 23%           | 1.68e-35 |
|                      | 3tsr E                           | 22%           | 1.26e-33 |
| mGenthrader          | 2bnh A                           | 21%           | 9e-11    |
|                      | 2q4g W                           | 21%           | 5e-10    |
|                      | 3un9 A                           | 22%           | 5e-08    |
| CS-BLAST             | 2bnh A                           | 20%           | 2e-44    |
|                      | 3tsr E                           | 22%           | 5e-43    |
|                      | 2q4g W                           | 20%           | 7e-40    |
| HHsearch             | 2ca6 A                           | 23%           | 100      |
|                      | 3goz A                           | 19%           | 100      |
|                      | 1z7x W                           | 21%           | 100      |
| SP3                  | 1a4y A                           | 21%           | -359     |
|                      | 1yrg A                           | 16%           | -341     |
|                      | 1xcd A                           | 21%           | -282     |
| FFAS                 | 1k5d C                           | 20%           | -45.4    |
|                      | 3goz A                           | 15%           | -45.2    |
|                      | 1z7x W                           | 18%           | -43.5    |
| Pcons5               | 3tsr E                           | 24%           | 3.71     |
|                      | 2bnh A                           | 22%           | 3.66     |
|                      | 2q4g W                           | 23%           | 3.6      |

2bnh A (7) Ribonuclease Inhibitor (*Sus scrofa*); 3tsr E (6) Ribonuclease Inhibitor (*Mus musculus*); 1z7x W (6) Ribonuclease Inhibitor (*Homo sapiens*); 2Q4G W (5) Ribonuclease Inhibitor (*Homo sapiens*); 2CA6 A (3) RNA1 GTPase activating Protein 1 (*Scizosaccoromyces pombe*); 1yrg A (2) RNA1 GTPase activating Protein 1 (*Scizosaccoromyces pombe*); 3goz A (2) Leucine-rich repeat-containing protein LegL7 (*Legionella pneumophila*); 1dfj I (1) Ribonuclease Inhibitor (*Sus scrofa*); 1a4y A (1) Ribonuclease Inhibitor (*Homo sapiens*); 1xcd A (1) decorin, the archetypal small leucine-rich repeat proteoglycan (*Bos taurus*); 1k5d C (1) RNA1 GTPase activating Protein 1 (*Scizosaccoromyces pombe*); 3un9 A(1) NLRX1 (*Homo sapiens*).



**Table S3.**

Binding site analysis report of different zNOD1 and iE-DAP complexes before and after MD simulation

| Complexes   | Interaction after docking (Initial conformation)                                                               | Interaction after 10ns molecular dynamics (final conformation)                                                                                                                |                                                                                                                                                                                                       |                                                                                                                                                                        |
|-------------|----------------------------------------------------------------------------------------------------------------|-------------------------------------------------------------------------------------------------------------------------------------------------------------------------------|-------------------------------------------------------------------------------------------------------------------------------------------------------------------------------------------------------|------------------------------------------------------------------------------------------------------------------------------------------------------------------------|
|             |                                                                                                                | Trajectory I                                                                                                                                                                  | Trajectory II                                                                                                                                                                                         | Trajectory III                                                                                                                                                         |
| Complex I   | Arg689, Arg690, Lys691, His692, Leu693, Pro712, Ser713, Phe714, Ser715, Met717                                 | <b>Leu693</b> , Gln709, Leu710, Arg711, <b>Pro712</b> , <b>Ser713</b> , <b>Phe714</b> , <b>Ser715</b> , <b>Lys716</b> , <b>Met717</b>                                         | <b>Leu693</b> , Thr718, Val719, Arg721, Lys746, Val747, Arg774                                                                                                                                        | <b>His692</b> , <b>Leu693</b> , Lys716, <b>Met717</b> , Thr718, Val719, Ile744, Lys746                                                                                 |
| Complex II  | Glu768, Lys797, Ser798, Lys799, Leu823, Lys824, Asn825, His826                                                 | <b>His826</b> , Pro827, Leu851, Lys852, Glu853, Thr855, Ser881, Asn882, Ser883, Ser884                                                                                        | His796, Lys797, <b>Ser798</b> , <b>Lys799</b> , Lys824, <b>Asn825</b>                                                                                                                                 | Pro771, His772, <b>Lys797</b> , <b>Ser798</b> , <b>Lys799</b> , <b>Lys824</b> , <b>Asn825</b> , Pro827                                                                 |
| Complex III | Arg774, Thr775, Val776, Lys777, Phe802, Asp803, Ile804, Gly805, Trp807, Asn831, Leu832, Ser833, Ile859, Trp861 | <b>Thr775</b> , <b>Val776</b> , <b>Lys777</b> , <b>Asp803</b> , <b>Ile804</b> , <b>Gly805</b> , <b>Trp807</b> , <b>Asn831</b> , <b>Ser833</b> , <b>Ile859</b> , <b>Trp861</b> | Val749, <b>Thr775</b> , <b>Val776</b> , <b>Lys777</b> , <b>Asp803</b> , <b>Ile804</b> , <b>Gly805</b> , <b>Trp807</b> , <b>Asn831</b> , <b>Leu832</b> , <b>Ser833</b> , <b>Ile859</b> , <b>Trp861</b> | <b>Thr775</b> , <b>Val776</b> , <b>Lys777</b> , <b>Asp803</b> , <b>Gly805</b> , <b>Trp807</b> , <b>Asn831</b> , <b>Ser833</b> , <b>Ile859</b> , <b>Trp861</b> , Ile863 |
| Complex IV  | Ile891, Asp892, Asn893, Glu894, Phe895, Ile918, Lys919, Gly920, Ser921, Arg922, Glu925                         | Thr896, Ile897, <b>Ile918</b> , <b>Lys919</b> , <b>Gly920</b> , <b>Ser921</b> , <b>Arg922</b> , Leu930, Tyr931, Gln932                                                        | <b>Asn893</b> , <b>Glu894</b> , <b>Phe895</b> , Thr896, Ile897, <b>Gly920</b> , <b>Ser921</b> , <b>Arg922</b> , Ile923, Ala926, His929, Leu930                                                        | Gln864, <b>Asp892</b> , <b>Asn893</b> , <b>Glu894</b> , <b>Phe895</b> , Thr896, Ile897, Ala900, <b>Ser921</b> , Ala926, Leu930                                         |
| Complex V   | Lys743, Glu768, Glu769, Lys797, Ser798, Lys799, Lys824, Asn825                                                 | Ile767, <b>Glu768</b> , <b>Glu769</b> , Cys770, Pro771, <b>Lys797</b> , <b>Ser798</b> , <b>Lys799</b> , <b>Lys824</b> , <b>Asn825</b>                                         | <b>Lys799</b> , Ser800, <b>Asn825</b> , Pro827                                                                                                                                                        | <b>Glu769</b> , Cys770, Pro771, <b>Ser798</b> , <b>Lys799</b> , <b>Lys824</b> , <b>Asn825</b> , His826, Pro827                                                         |
| Complex VI  | Asp698, Asn699, Arg721, Cys723, Tyr751, Lys777, Trp807                                                         | Tyr751, Leu778, Gly779, <b>Trp807</b> , Gly808, Ser833, Ser835, Ile863                                                                                                        | <b>Asp698</b> , <b>Asn699</b> , <b>Cys723</b> , Val724, <b>Tyr751</b> , Gln752, Cys780, <b>Trp807</b>                                                                                                 | <b>Cys723</b> , Val724, <b>Tyr751</b> , Gln752, Leu778, Gly779, Cys780, <b>Trp807</b> , Gly808                                                                         |

Bold letter represents the conserved interactions before and after MD simulation
